# Supplementary material for: fMLP-Induced IL-8 Release Is Dependent on NADPH Oxidase in Human Neutrophils
Source: PubMed Central journal article supplement (PMC4655063; doi:10.1155/2015/120348), 2015-11-08

Supplemental Figure

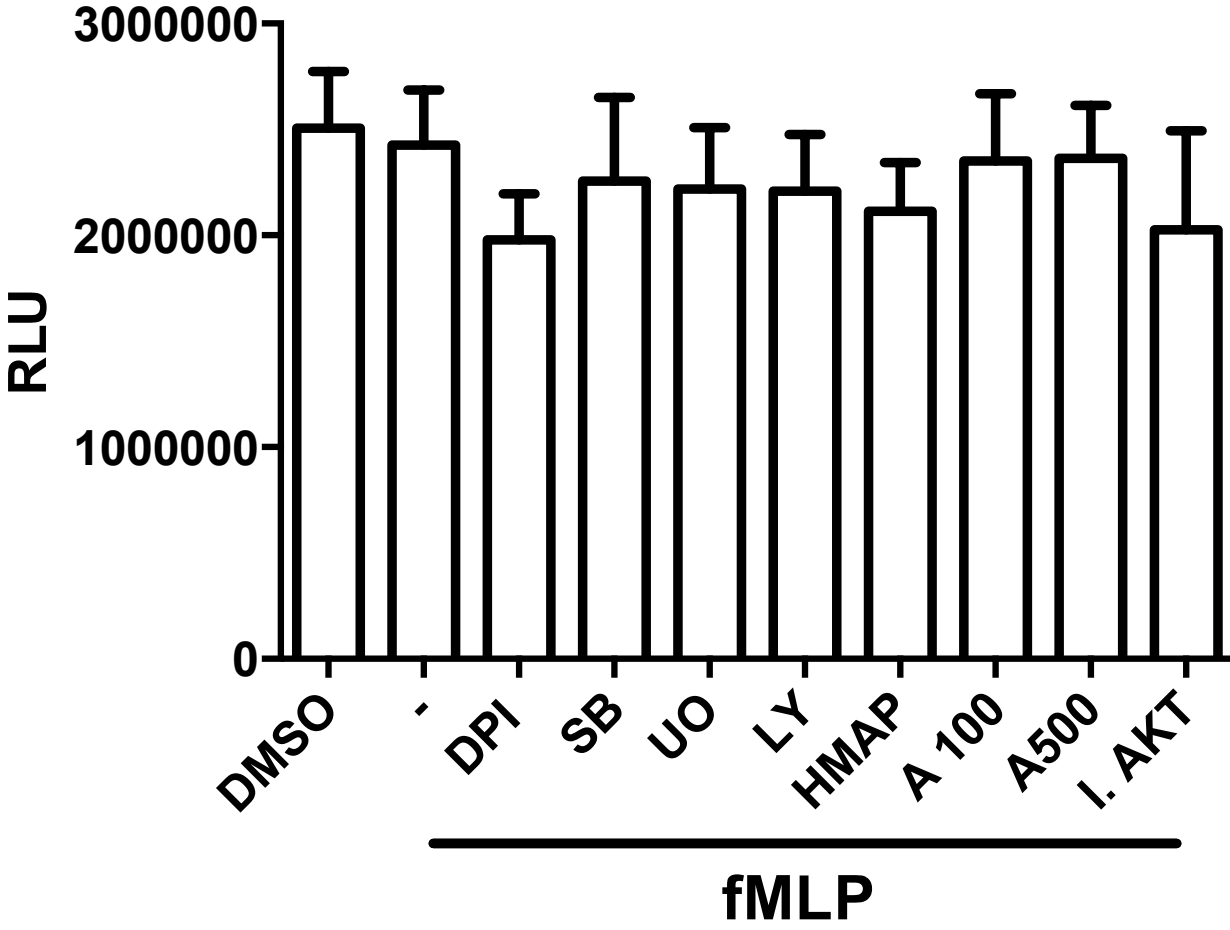

Supplement: 120348.f1.pdf [file 120348.f1.pdf]
